# Supplementary material for: Periodic density functional theory calculations for 3-dimensional polyacetylene with empirical dispersion terms
Source: Royal Society of Chemistry journal article supplement (doi:10.1039/b918539a), 2010-01-01
Supplement: b918539a.pdf [file b918539a.pdf]

TABLE 1S: Starting geometric parameters for geometry optimization of the  $P2_1/n$  model.  
 Cell parameters:  $A=4.17000000\text{\AA}$ ,  $B=7.39000000\text{\AA}$ ,  $C=2.46000000\text{\AA}$ ,  $\alpha=90.000000$ ,  
 $\beta=90.600000$ ,  $\gamma=90.000000$

|   | X/A                 | Y/B                 | Z/C                                          |
|---|---------------------|---------------------|----------------------------------------------|
| C | 6.290000000000E-02  | 2.830000000000E-02  | 2.407000000000E-01 <input type="checkbox"/>  |
| C | 4.371000000000E-01  | -4.717000000000E-01 | -2.407000000000E-01 <input type="checkbox"/> |
| C | -6.290000000000E-02 | -2.830000000000E-02 | -2.407000000000E-01 <input type="checkbox"/> |
| C | -4.371000000000E-01 | 4.717000000000E-01  | 2.407000000000E-01 <input type="checkbox"/>  |
| H | 2.706000000000E-01  | 1.217000000000E-01  | 2.407000000000E-01 <input type="checkbox"/>  |
| H | 2.294000000000E-01  | -3.783000000000E-01 | -2.407000000000E-01 <input type="checkbox"/> |
| H | -2.706000000000E-01 | -1.217000000000E-01 | -2.407000000000E-01 <input type="checkbox"/> |
| H | -2.294000000000E-01 | 3.783000000000E-01  | 2.407000000000E-01 <input type="checkbox"/>  |

TABLE 2S: Starting geometric parameters for geometry optimization of the  $P2_1/a$  model.  
 Cell parameters:  $A=4.17000000\text{\AA}$ ,  $B=7.39000000\text{\AA}$ ,  $C=2.46000000\text{\AA}$ ,  $\alpha=90.000000$ ,  
 $\beta=90.600000$ ,  $\gamma=90.000000$

|   | X/A                 | Y/B                 | Z/C                                          |
|---|---------------------|---------------------|----------------------------------------------|
| C | 6.290000000000E-02  | 2.830000000000E-02  | 2.407000000000E-01 <input type="checkbox"/>  |
| C | 4.371000000000E-01  | -4.717000000000E-01 | 2.593000000000E-01 <input type="checkbox"/>  |
| C | -6.290000000000E-02 | -2.830000000000E-02 | -2.407000000000E-01 <input type="checkbox"/> |
| C | -4.371000000000E-01 | 4.717000000000E-01  | -2.593000000000E-01 <input type="checkbox"/> |
| H | 2.706000000000E-01  | 1.217000000000E-01  | 2.407000000000E-01 <input type="checkbox"/>  |
| H | 2.294000000000E-01  | -3.783000000000E-01 | 2.593000000000E-01 <input type="checkbox"/>  |
| H | -2.706000000000E-01 | -1.217000000000E-01 | -2.407000000000E-01 <input type="checkbox"/> |
| H | -2.294000000000E-01 | 3.783000000000E-01  | -2.593000000000E-01 <input type="checkbox"/> |
